# Supplementary material
Source: Springer Nature journal article supplement (https://www.springermedizin.de/resource/supplementary/12889_2009_2265_MOESM1_ESM.pdf/9485190)
Supplement: MOESM1 [file 9485190]

### PMTCT Service Accessible/Acceptable/Affordable:

1. Mother (with father) attends a service offering PMTCT
2. Mother (with father) accepts HIV counselling and testing
3. Mother (with father) receives and accepts results of test

### PMTCT for Mother Accessible/Acceptable/Affordable:

4. Mother dispensed antiretroviral prophylaxis
5. Mother takes antiretroviral prophylaxis as prescribed

### PMTCT for Baby Accessible/Acceptable/Affordable:

6. Baby accesses antiretroviral prophylaxis
7. Baby given antiretroviral prophylaxis
8. Safe feeding practices used
